# Supplementary material
Source: PubMed Central journal article supplement (PMC5860034)

## Supplementary Data

**Table S1.** Cross-validation accuracy across SNN and PID bins.

| <b>SNN Bin</b> | <b>PID Bin</b> | <b>Correct</b> | <b>Total</b> | <b>Percent Accuracy</b> |
|----------------|----------------|----------------|--------------|-------------------------|
| 0-1            | <60            | 1458           | 1841         | 0.79                    |
| 0-1            | 60-70          | 228            | 251          | 0.91                    |
| 0-1            | <60            | 16             | 34           | 0.47                    |
| 0-1            | 60-70          | 812            | 905          | 0.90                    |
| 0-1            | 70-80          | 670            | 753          | 0.89                    |
| 0-1            | 80-90          | 454            | 548          | 0.83                    |
| 0-1            | >90            | 1428           | 1771         | 0.81                    |
| 1-2            | 60-70          | 1              | 1            | 1.00                    |
| 1-2            | 70-80          | 176            | 183          | 0.96                    |
| 1-2            | 80-90          | 317            | 349          | 0.91                    |
| 1-2            | >90            | 648            | 721          | 0.90                    |
| 2-3            | 70-80          | 22             | 22           | 1.00                    |
| 2-3            | 80-90          | 105            | 111          | 0.95                    |
| 2-3            | >90            | 602            | 654          | 0.92                    |
| 3-4            | 70-80          | 2              | 2            | 1.00                    |
| 3-4            | 80-90          | 57             | 57           | 1.00                    |
| 3-4            | >90            | 349            | 359          | 0.97                    |
| >4             | 80-90          | 25             | 25           | 1.00                    |
| >4             | >90            | 195            | 198          | 0.98                    |

**Table S2.** Summary and accession information for all A-domains used in this study.

See attached file: SANDPUMA\_TableS2.xlsx

**Table S3.** A-domain prediction methods used.

| <b>Method</b>      | <b>Predictor Type</b>        | <b>Year of Training</b> |
|--------------------|------------------------------|-------------------------|
| Bachmann-Ravel     | Active-site Motifs           | 2009                    |
| Khayatt            | Profile Hidden Markov Models | 2013                    |
| prediCAT           | Tree-based                   | 2016                    |
| Minowa             | Profile Hidden Markov Models | 2007                    |
| NRPSPredictor2 ASM | Active-site Motifs           | 2011                    |
| NRPSPredictor2 SVM | Support Vector Machines      | 2011                    |
| NRPSSP             | Profile Hidden Markov Models | 2012                    |
| SEQL-NRPS          | Greedy Coordinate-descent    | 2015                    |

**Table S4.** McNemar p-values < 0.05 for shared coverage A-domains denote significant differences between correct and incorrect classifications between algorithms. Absent pairings were not significant.

| Method A                        | Method B                  | Shared Coverage Count | McNemar p-value |
|---------------------------------|---------------------------|-----------------------|-----------------|
| NRPSPredictor2 - ASM            | Minowa                    | 336                   | 2.41E-13        |
| NRPSPredictor2 - ASM            | Khayatt                   | 429                   | 2.39E-09        |
| NRPSPredictor2 - SVM            | Minowa                    | 262                   | 5.39E-09        |
| NRPSPredictor2 - ASM            | SEQL-NRPS                 | 429                   | 4.59E-08        |
| NRPSPredictor2 - ASM            | prediCAT - Monophyly & NN | 410                   | 9.56E-07        |
| NRPSPredictor2 - ASM            | NRPSSP                    | 429                   | 1.21E-05        |
| NRPSPredictor2 - SVM            | Khayatt                   | 303                   | 1.81E-05        |
| NRPSSP                          | Minowa                    | 337                   | 5.23E-05        |
| NRPSPredictor2 - ASM            | Bachmann-Ravel            | 304                   | 5.23E-05        |
| NRPSPredictor2 - SVM            | SEQL-NRPS                 | 303                   | 1.78E-04        |
| NRPSPredictor2 - SVM            | prediCAT - Monophyly & NN | 290                   | 2.00E-04        |
| Khayatt                         | Minowa                    | 337                   | 1.43E-03        |
| prediCAT - Monophyly & NN       | Minowa                    | 321                   | 3.57E-03        |
| Bachmann-Ravel                  | Minowa                    | 272                   | 3.57E-03        |
| prediCAT - SNN Score $\geq$ 0.5 | Minowa                    | 58                    | 4.43E-03        |
| NRPSPredictor2 - SVM            | Bachmann-Ravel            | 247                   | 1.04E-02        |
| prediCAT - SNN Score $\geq$ 0.5 | SEQL-NRPS                 | 63                    | 1.33E-02        |
| Bachmann-Ravel                  | SEQL-NRPS                 | 306                   | 1.61E-02        |
| prediCAT - SNN Score $\geq$ 0.5 | NRPSSP                    | 63                    | 4.12E-02        |
| NRPSPredictor2 - SVM            | NRPSSP                    | 303                   | 4.25E-02        |

**Table S5.** Classification statistics of SANDPUMA (max depth 40, minimum leaf support 10) on cross-validated (CV) dataset by substrate specificity. Cross-validation followed the scheme in Figure S2. The full dataset was randomized and broken into ~10% subsets (either 93 or 92 A-domain sequences). For each subset, SANDPUMA’s individual algorithms were trained on the remaining 90% of the data. Method accuracy was assessed by querying the subset against these models. 100 query sets and training sets were assessed (10 randomizations each with 10 subsets) totaling 9280 individual queries.

| Substrate                                   | # CV Queries | Precision | Recall | F-score |
|---------------------------------------------|--------------|-----------|--------|---------|
| (4R)-4[(E)-2-butenyl]-4-methyl- L-threonine | 29           | 0.476     | 0.345  | 0.4     |
| 2,3-dehydroaminobutyric acid                | 40           | 0.719     | 0.575  | 0.639   |
| 2,3-dihydroxy-benzoic acid                  | 10           | 1         | 1      | 1       |
| 2,4-diamino-butyric acid                    | 128          | 0.847     | 0.906  | 0.875   |
| 2-aminobutyric acid                         | 20           | 1         | 0.5    | 0.667   |
| 3,5-dihydroxy-phenyl-glycine                | 150          | 1         | 1      | 1       |
| 3-aminoadipic acid                          | 110          | 1         | 1      | 1       |
| 3-hydroxy-3-methyl-proline                  | 20           | 1         | 0.85   | 0.919   |
| 4-hydroxy-phenyl-glycine                    | 88           | 1         | 0.989  | 0.994   |
| 4-hydroxy-proline                           | 20           | 1         | 0.9    | 0.947   |
| Alanine                                     | 545          | 0.863     | 0.783  | 0.821   |
| Allo-isolucine                              | 10           | 0.769     | 1      | 0.87    |
| Allo-threonine                              | 30           | 0.667     | 0.333  | 0.444   |
| Alpha-hydroxy-glycine                       | 10           | 0.435     | 1      | 0.606   |
| Alpha-methyl-serine                         | 10           | 1         | 0.7    | 0.824   |
| Arginine                                    | 90           | 0.673     | 0.367  | 0.475   |
| Asparagine                                  | 297          | 0.993     | 0.953  | 0.973   |
| Aspartic acid                               | 250          | 0.942     | 0.916  | 0.929   |
| Beta-alanine                                | 40           | 0.682     | 0.375  | 0.484   |
| Beta-hydroxy-tyrosine                       | 95           | 0.989     | 0.926  | 0.957   |
| Cysteine                                    | 250          | 1         | 0.864  | 0.927   |
| D- 2,4-diamino-butyric acid                 | 10           | 1         | 0.8    | 0.889   |
| D-alanine                                   | 40           | 0.833     | 0.25   | 0.385   |
| D-allo-threonine                            | 20           | 0.619     | 0.65   | 0.634   |
| D-asparagine                                | 10           | 0.714     | 1      | 0.833   |
| D-cyclo- hydroxyornithine                   | 10           | 0.2       | 0.2    | 0.2     |
| Deoxy-threonine                             | 20           | 1         | 0.9    | 0.947   |
| D-glutamine                                 | 30           | 1         | 0.4    | 0.571   |
| D-leu                                       | 50           | 0.634     | 0.52   | 0.571   |
| D-proline                                   | 19           | 0.783     | 0.947  | 0.857   |
| D-serine                                    | 30           | 0.897     | 0.867  | 0.881   |
| D-tryptophan                                | 10           | 0.833     | 0.5    | 0.625   |
| D-valine                                    | 80           | 1         | 0.675  | 0.806   |
| Gamma-hydroxy-valine                        | 10           | 0.889     | 0.8    | 0.842   |
| Glutamic acid                               | 210          | 0.864     | 0.881  | 0.873   |
| Glutamine                                   | 200          | 0.925     | 0.62   | 0.743   |

|                           |     |       |       |       |
|---------------------------|-----|-------|-------|-------|
| Glycine                   | 380 | 1     | 0.887 | 0.94  |
| Histidine                 | 30  | 1     | 0.267 | 0.421 |
| Hydroxyornithine          | 110 | 0.875 | 0.636 | 0.737 |
| Isoleucine                | 210 | 0.925 | 0.824 | 0.872 |
| Kynurenic acid            | 20  | 1     | 0.8   | 0.889 |
| Leucine                   | 760 | 0.91  | 0.854 | 0.881 |
| Lysine                    | 190 | 0.812 | 0.589 | 0.683 |
| Methionine                | 10  | 0.286 | 0.8   | 0.421 |
| Methyl-aspartic acid      | 40  | 0.976 | 1     | 0.988 |
| N-hydroxy-alanine         | 10  | 1     | 0.8   | 0.889 |
| N-hydroxy-valine          | 20  | 0.95  | 0.95  | 0.95  |
| N-methyl-hydroxyornithine | 20  | 0.15  | 0.3   | 0.2   |
| Ornithine                 | 210 | 0.774 | 0.867 | 0.818 |
| Phenylacetate             | 30  | 0.903 | 0.933 | 0.918 |
| Phenylalanine             | 209 | 0.904 | 0.722 | 0.803 |
| Pipecolic acid            | 80  | 0.982 | 0.7   | 0.818 |
| Proline                   | 300 | 0.86  | 0.837 | 0.848 |
| Serine                    | 630 | 0.979 | 0.897 | 0.936 |
| Threonine                 | 524 | 0.905 | 0.889 | 0.897 |
| Tryptophan                | 200 | 0.882 | 0.485 | 0.626 |
| Tyrosine                  | 260 | 0.942 | 0.746 | 0.833 |
| Valine                    | 725 | 0.92  | 0.83  | 0.873 |

**Table S6:** Comparison across methods of substrate specificity F-scores assessed by a cross-validation scheme as described in Figure S2 and Table S5.

| Substrate    | # CV Queries | prediCAT_MP | prediCAT_SNN | ASM   | SVM   | pHMM  | SANDPUMA |
|--------------|--------------|-------------|--------------|-------|-------|-------|----------|
| 3oh-3me-pro  | 20           | 0.947       | 0.947        | 0.947 | NA    | NA    | 0.919    |
| 3oh-leu      | 20           | 0.947       | 0.923        | 1.000 | NA    | NA    | NA       |
| 4oh-pro      | 20           | NA          | NA           | NA    | NA    | NA    | 0.947    |
| aad          | 110          | 0.830       | 0.682        | 1.000 | 0.887 | 0.900 | 1.000    |
| abu          | 20           | NA          | NA           | NA    | NA    | NA    | 0.667    |
| aeo          | 20           | NA          | 0.909        | 1.000 | NA    | NA    | NA       |
| aile         | 10           | NA          | NA           | NA    | NA    | NA    | 0.870    |
| ala          | 570          | 0.627       | 0.435        | 0.774 | 0.731 | 0.667 | 0.821    |
| alpha-me-ser | 10           | NA          | NA           | NA    | NA    | NA    | 0.824    |
| aoh-gly      | 10           | NA          | NA           | NA    | NA    | NA    | 0.606    |
| arg          | 90           | 0.357       | 0.361        | 0.857 | 0.562 | 0.459 | 0.475    |
| asn          | 300          | 0.762       | 0.625        | 0.948 | 0.963 | 0.843 | 0.973    |
| asp          | 250          | 0.802       | 0.652        | 0.920 | 0.930 | 0.777 | 0.929    |
| athr         | 30           | NA          | NA           | NA    | NA    | NA    | 0.444    |
| b-ala        | 40           | NA          | NA           | 0.750 | NA    | NA    | 0.484    |
| bht          | 100          | 0.734       | 0.988        | 1.000 | 0.959 | 0.876 | 0.957    |
| blys         | 30           | NA          | NA           | 1.000 | NA    | 0.154 | NA       |
| bmt          | 29           | NA          | NA           | NA    | NA    | NA    | 0.400    |
| cys          | 250          | 0.804       | 0.345        | 0.948 | 0.947 | 0.892 | 0.927    |
| dab          | 130          | 0.817       | 0.706        | 0.932 | NA    | 0.843 | 0.875    |
| d-ala        | 40           | NA          | NA           | NA    | NA    | NA    | 0.385    |
| d-asn        | 10           | NA          | NA           | NA    | NA    | NA    | 0.833    |
| d-athr       | 20           | NA          | 0.433        | NA    | NA    | NA    | 0.634    |
| d-cyclo-horn | 10           | NA          | NA           | NA    | NA    | NA    | 0.200    |
| d-dab        | 10           | NA          | NA           | NA    | NA    | NA    | 0.889    |
| deoxy-thr    | 20           | NA          | 0.690        | NA    | NA    | NA    | 0.947    |
| d-gln        | 30           | NA          | 0.286        | NA    | NA    | NA    | 0.571    |
| dhabu        | 40           | 0.196       | 0.629        | NA    | NA    | 0.475 | 0.639    |
| dhb          | 20           | NA          | NA           | NA    | 1.000 | NA    | 1.000    |
| d-leu        | 50           | NA          | 0.020        | NA    | NA    | NA    | 0.571    |
| dpg          | 150          | 0.976       | 1.000        | 1.000 | NA    | 1.000 | 1.000    |
| d-pro        | 20           | NA          | 0.667        | NA    | NA    | NA    | 0.857    |
| d-ser        | 30           | 0.667       | 0.952        | NA    | NA    | 0.714 | 0.881    |
| d-trp        | 10           | NA          | NA           | NA    | NA    | NA    | 0.625    |
| d-val        | 80           | 0.508       | 0.546        | NA    | NA    | 0.727 | 0.806    |
| gln          | 200          | 0.421       | 0.372        | 0.737 | 0.640 | 0.299 | 0.743    |
| glu          | 210          | 0.514       | 0.517        | 0.909 | 0.873 | 0.665 | 0.873    |
| gly          | 380          | 0.786       | 0.389        | 0.951 | 0.930 | 0.650 | 0.940    |
| goh-val      | 10           | NA          | NA           | NA    | NA    | NA    | 0.842    |
| his          | 30           | NA          | NA           | NA    | NA    | NA    | 0.421    |
| horn         | 110          | 0.589       | 0.467        | 0.735 | NA    | 0.593 | 0.737    |
| hpg          | 90           | 0.379       | 0.928        | 1.000 | 0.942 | 0.722 | 0.994    |
| hse          | 20           | NA          | 0.947        | 0.947 | NA    | NA    | NA       |
| ile          | 210          | 0.581       | 0.644        | 0.848 | 0.844 | 0.542 | 0.872    |
| kyn          | 20           | 1.000       | 0.909        | 1.000 | NA    | NA    | 0.889    |
| leu          | 760          | 0.681       | 0.604        | 0.885 | 0.813 | 0.703 | 0.881    |
| lys          | 190          | 0.565       | 0.531        | 0.680 | 0.413 | 0.534 | 0.683    |
| me-asp       | 40           | 0.857       | 0.988        | 1.000 | NA    | 1.000 | 0.988    |
| met          | 10           | NA          | NA           | NA    | NA    | NA    | 0.421    |
| nme-fhorn    | 20           | NA          | NA           | NA    | NA    | NA    | 0.200    |
| noh-ala      | 10           | NA          | NA           | NA    | NA    | NA    | 0.889    |
| noh-val      | 20           | 1.000       | 0.952        | 0.952 | NA    | NA    | 0.950    |
| orn          | 210          | 0.772       | 0.676        | 0.833 | 0.554 | 0.721 | 0.818    |
| phe          | 210          | 0.449       | 0.168        | 0.626 | 0.760 | 0.407 | 0.803    |
| phe-ac       | 30           | 0.667       | 0.829        | 0.696 | NA    | 0.710 | 0.918    |
| pip          | 80           | 0.457       | 0.521        | 0.580 | 0.855 | 0.640 | 0.818    |
| pro          | 300          | 0.633       | 0.544        | 0.896 | 0.838 | 0.796 | 0.848    |
| ser          | 630          | 0.796       | 0.638        | 0.893 | 0.880 | 0.707 | 0.936    |
| thr          | 540          | 0.548       | 0.510        | 0.376 | 0.799 | 0.763 | 0.897    |
| trp          | 200          | 0.604       | 0.448        | 0.669 | 0.605 | 0.367 | 0.626    |
| tyr          | 260          | 0.647       | 0.630        | 0.870 | 0.796 | 0.660 | 0.833    |
| val          | 740          | 0.683       | 0.595        | 0.776 | 0.742 | 0.750 | 0.873    |

**Table S7. Classification space of SANDPUMA and individual methods.**

| Method                     | Total Substrates in Classification Space |
|----------------------------|------------------------------------------|
| ASM                        | 82                                       |
| pHMM                       | 52                                       |
| prediCAT (SNN $\geq 0.5$ ) | 73                                       |
| prediCAT Monophyly         | 67                                       |
| SVM                        | 26                                       |
| SANDPUMA                   | 104                                      |



**Fig. S1.** Frequency of nearest neighbor distance across cross-validation analysis. Empirical cutoff of 2.5 shown as dotted line.

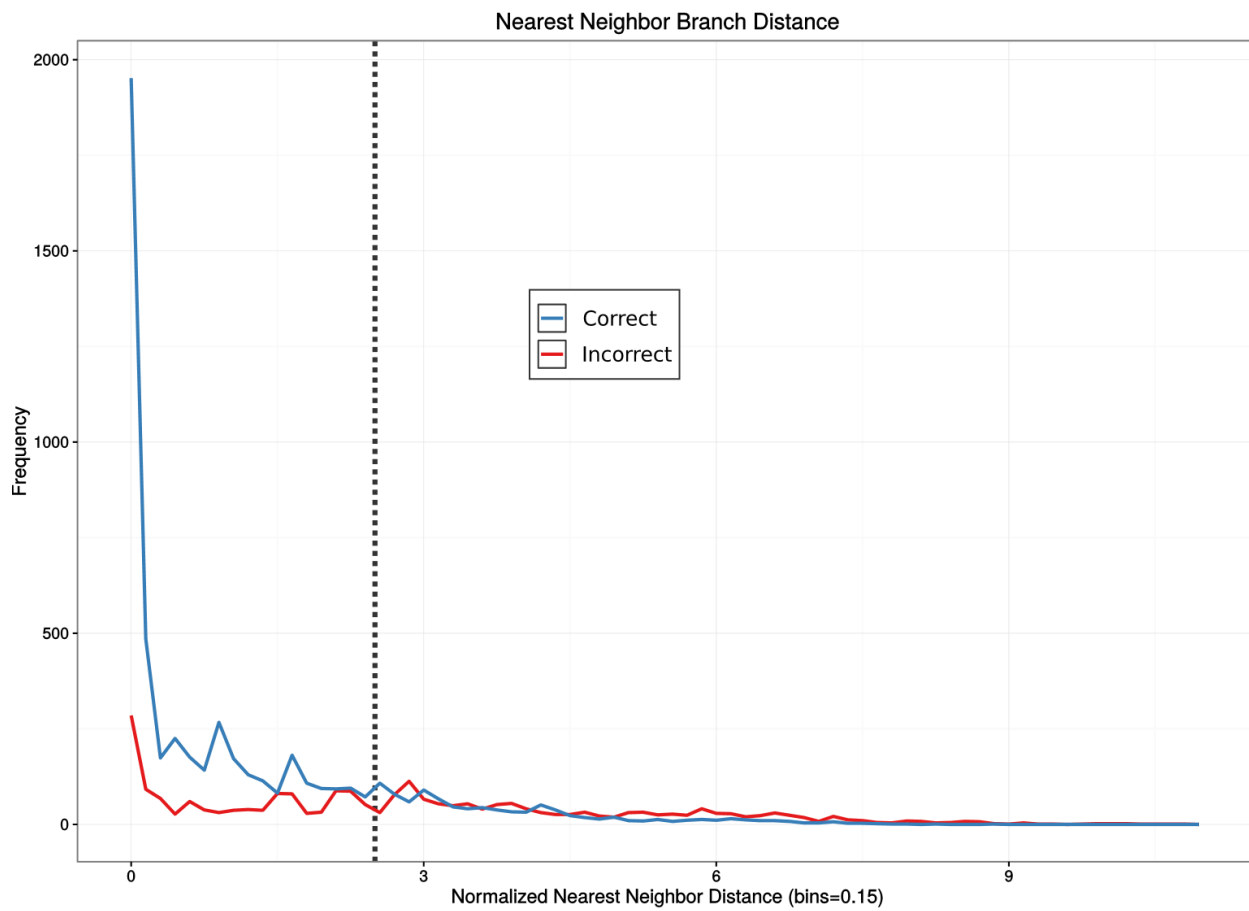

**Fig. S2.** Schematic of cross-validation resampling analysis.

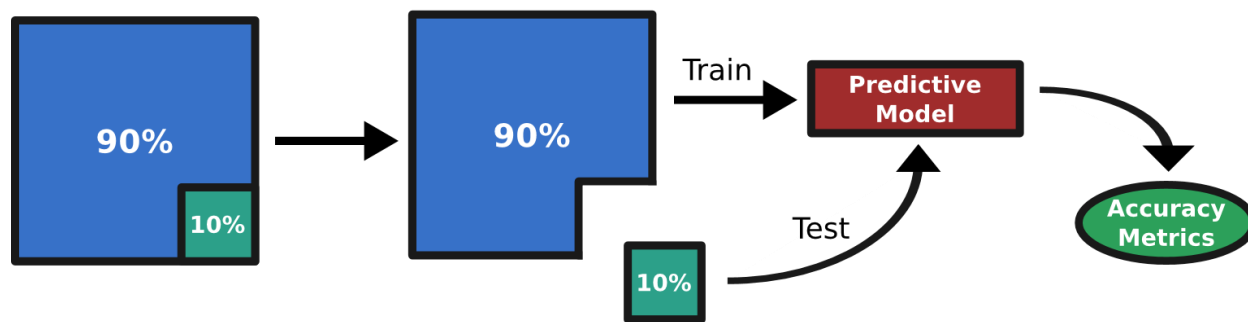

**Fig. S3.** Decision tree accuracies across max depths and minimum leaf supports.

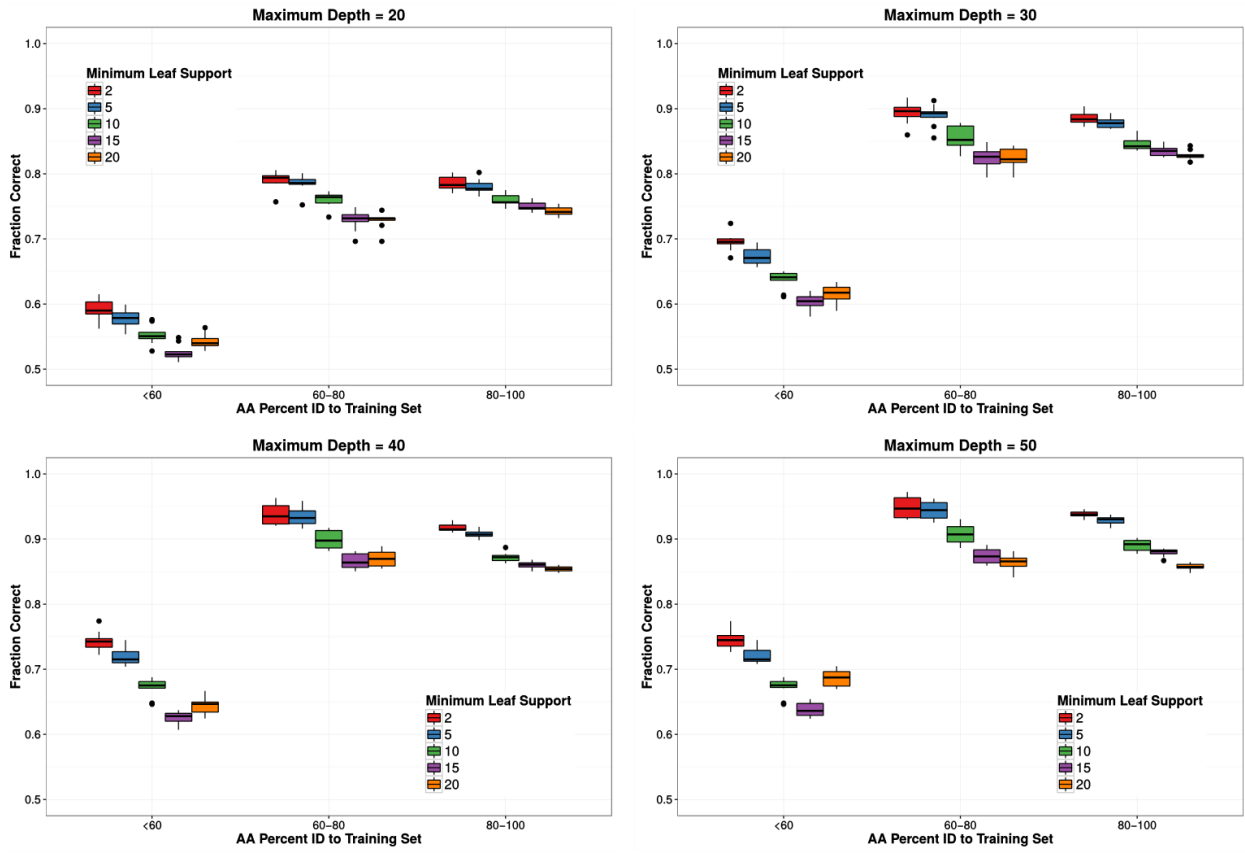

**Fig. S4.** SANDPUMA SML decision training with methods removed for full dataset (a) and for amino acids with 2 or less examples in the dataset (b).

**A**

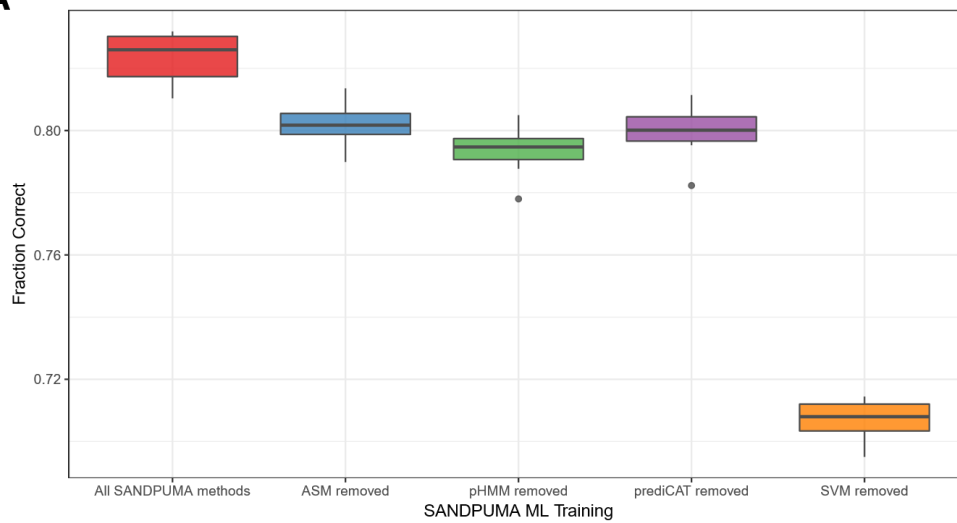

**B**

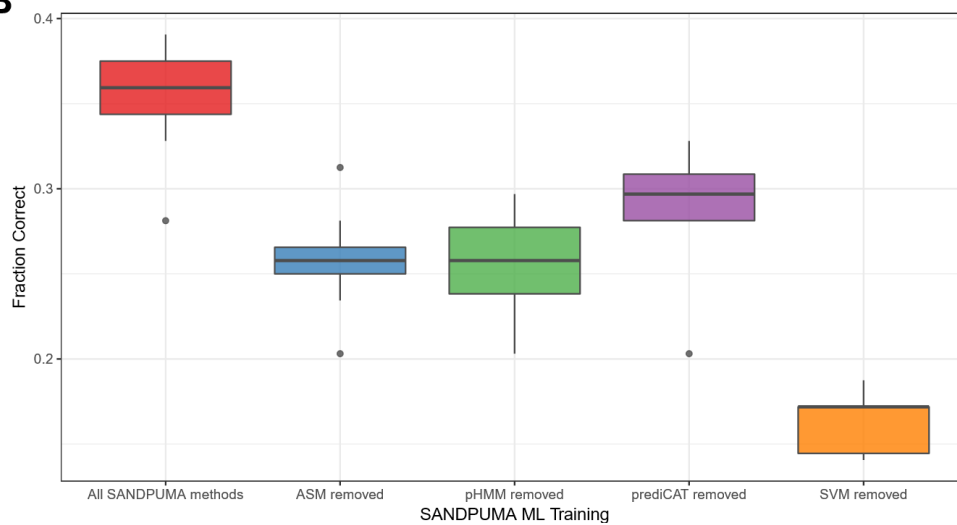

Fig. S5. Accuracy of SML decision paths.

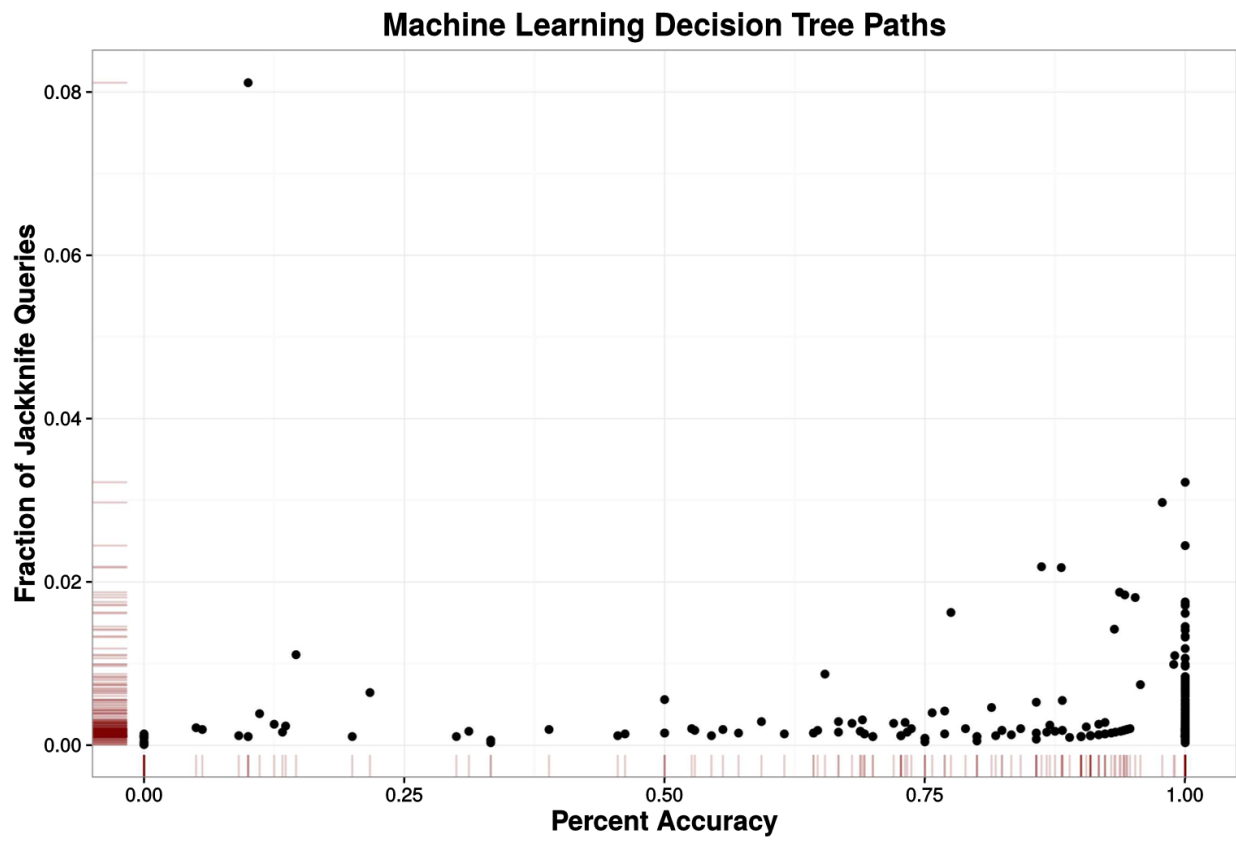

**Fig. S6.** Cross-validation shared coverage for individual methods (a), fraction correct (b), and coverage (c).

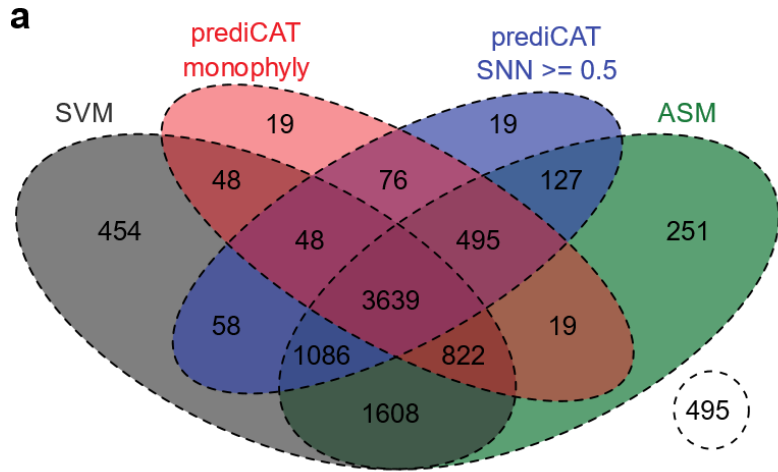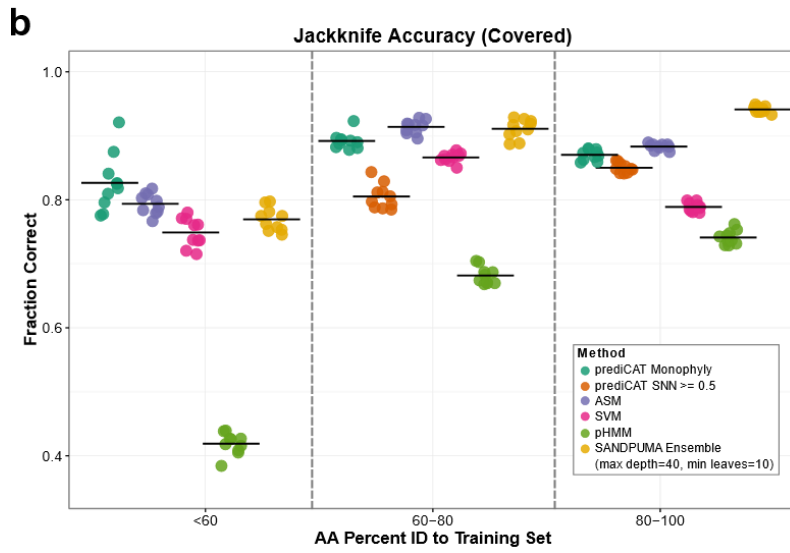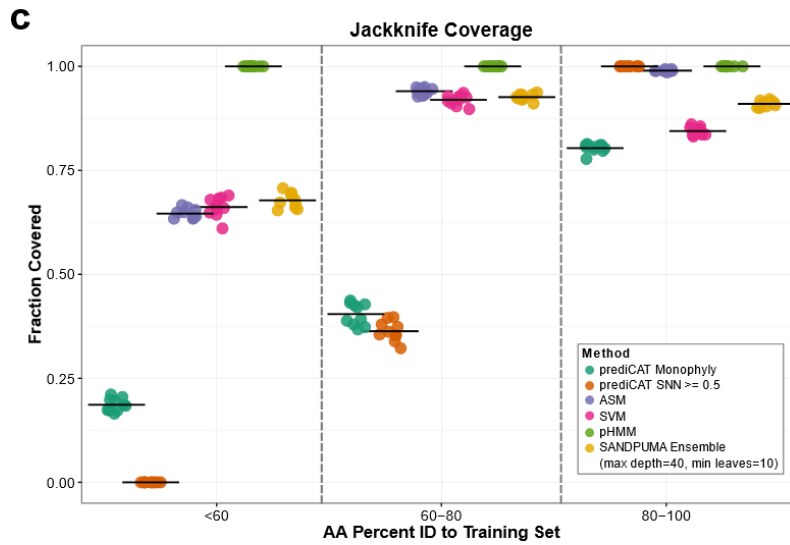

**Fig. S7.** Accuracy (a) and coverage (b) comparisons of cross-validations. CV2 represents a second, independent cross-validation.

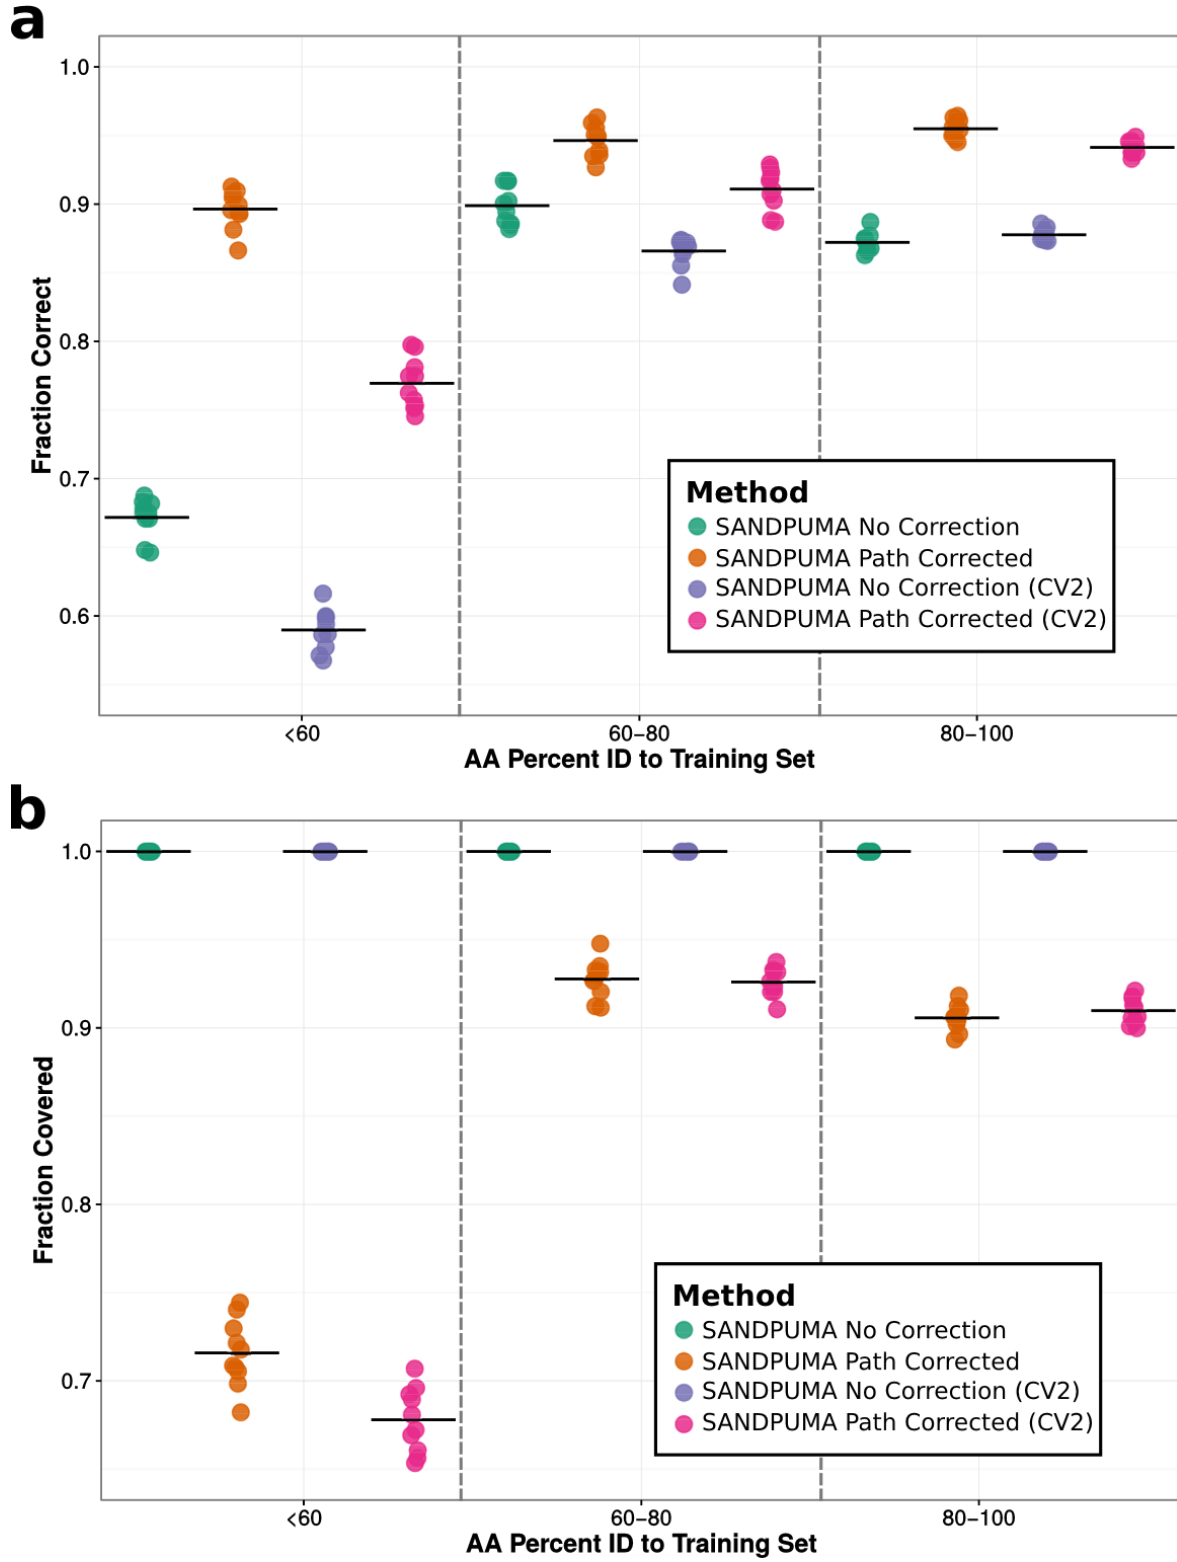

**Fig. S8.** Multilocus phylogeny of Actinobacteria denoting number of genomes available and NRP BGCs per genome. Branches with bootstrap values <100 are marked.

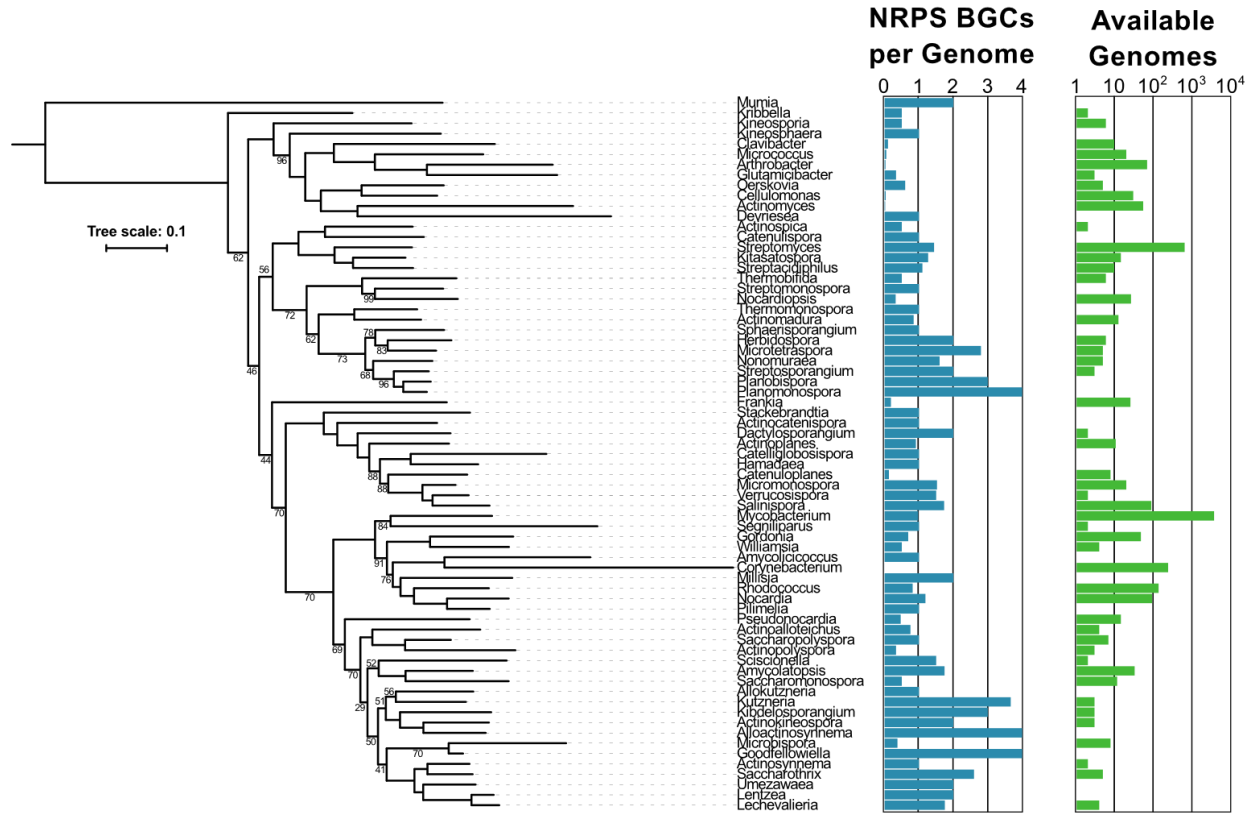



**Fig. S9.** Distribution of the number of network subgraphs at each size for all NRP BGCs (blue) and NRP BGCs >10kb from the end of its contig (red).

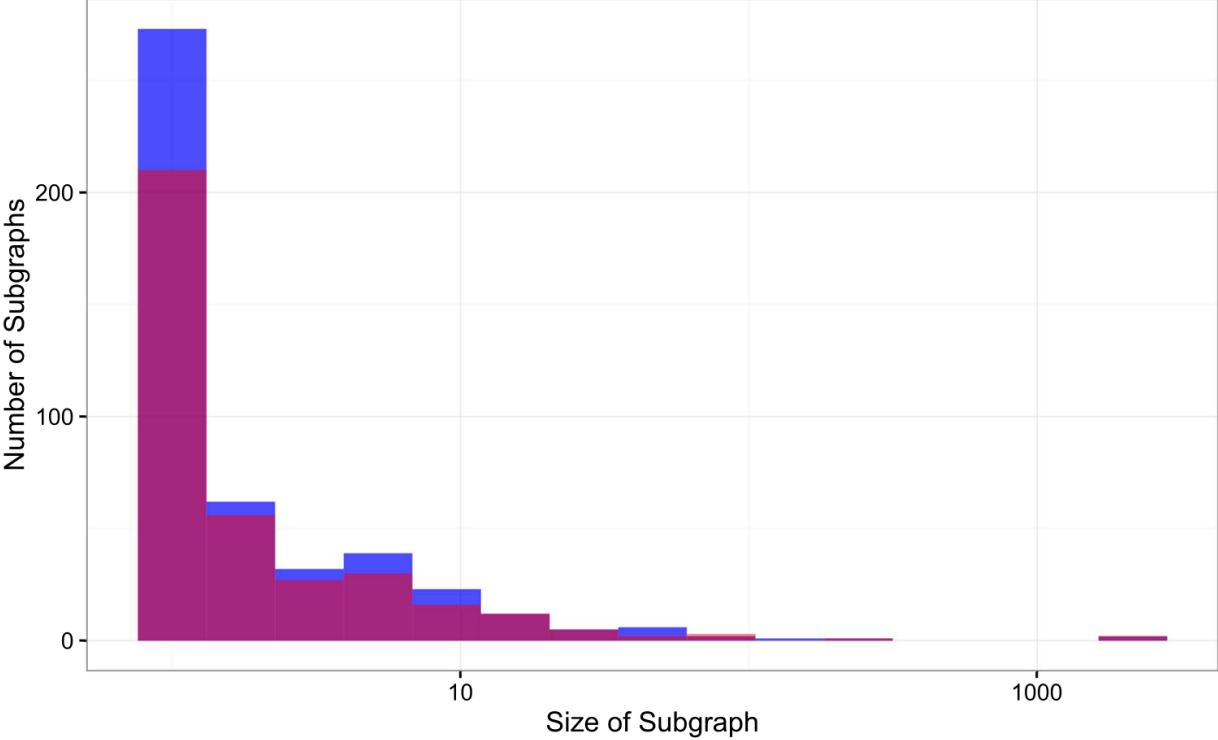

Supplement: btx400_sandpuma_sup.pdf [file btx400_sandpuma_sup.pdf]
